# Supplementary material for: Co-Variation between Seed Dormancy, Growth Rate and Flowering Time Changes with Latitude in Arabidopsis thaliana
Source: PubMed Central journal article supplement (PMC3662791; doi:10.1371/journal.pone.0061075), 2013-05-23

Fig. S1 Population structure and detection of the true number of clusters (K) via graphical method

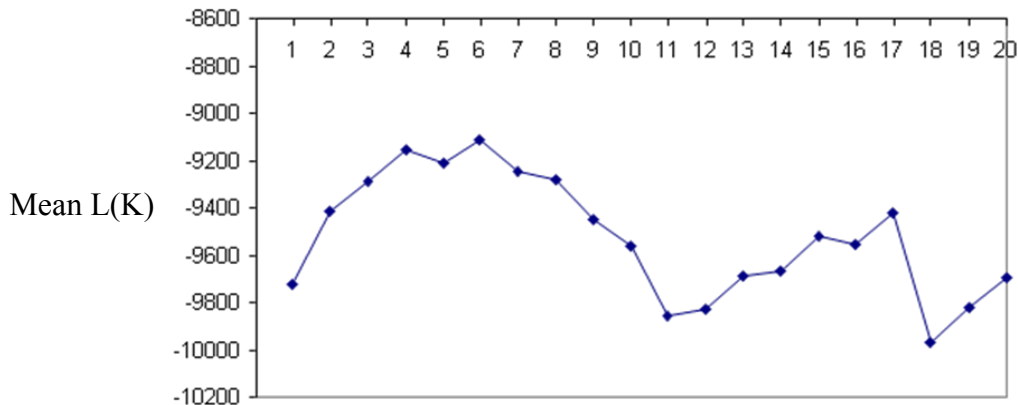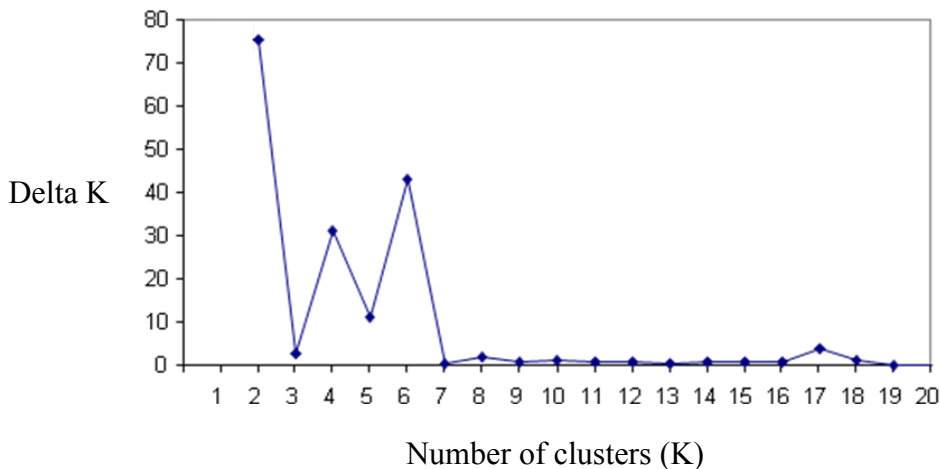

Supplement: pone.0061075.s001.pdf [file pone.0061075.s001.pdf]
