# Supplementary material for: Co-Variation between Seed Dormancy, Growth Rate and Flowering Time Changes with Latitude in Arabidopsis thaliana
Source: PubMed Central journal article supplement (PMC3662791; doi:10.1371/journal.pone.0061075), 2013-05-23
Supplement: pone.0061075.s002.pdf [file pone.0061075.s002.pdf]

| Stock Number (CS) | Name    | Country        | Longitude | Latitude | Primary dormancy-rep1 | Primary dormancy-rep2 | Primary dormancy-rep3 | Primary dormancy | Secondary dormancy | Vegetative growth rate | Flowering time | Population structure |
|-------------------|---------|----------------|-----------|----------|-----------------------|-----------------------|-----------------------|------------------|--------------------|------------------------|----------------|----------------------|
| 6600              | Aa-0    | Germany        | 9.6       | 50.9     | 17.39                 | NA                    | NA                    | 50.72            | 1.3                | 0.090105               | 67             | 0.509                |
| 22630             | Ag-0    | France         | 1.5       | 45       | NA                    | 65                    | 0.02                  | 192.07           | NA                 | 0.071242               | 65.75          | 0.403                |
| 1656              | Alc-0   | Spain          | -3.2      | 40.31    | NA                    | NA                    | NA                    | 264              | NA                 | 0.122722               | 67             | 0.459                |
| 22526             | Amel-1  | Netherlands    | 5.8       | 53.1     | 32.77                 | NA                    | NA                    | 72.32            | 1.54               | 0.064747               | 71.5           | 0.454                |
| 22626             | An-1    | Belgium        | 4.5       | 51.4     | 3.5                   | 1                     | 0.12                  | 7.14             | 0.99               | 0.073064               | 58.75          | 0.43                 |
| 22519             | Ang     | France         | 0.6       | 47.5     | 4.93                  | NA                    | NA                    | 107.44           | 0.12               | 0.083582               | 59.5           | 0.136                |
| 22520             | Ann-1   | France         | 6.1       | 45.9     | 17.5                  | NA                    | NA                    | 35.61            | 0.88               | 0.113886               | 65.75          | 0.217                |
| 22529             | Baa-1   | Netherlands    | 6.1       | 51.3     | 55.46                 | NA                    | NA                    | 98.77            | 2.21               | 0.099215               | 67.75          | 0.395                |
| 22633             | Bay-0   | Germany        | 11        | 49       | 3.5                   | 0                     | 0.27                  | 4.59             | 0.66               | 0.249604               | 58.5           | 0.555                |
| 6613              | Be-0    | Germany        | 9         | 50       | 3.66                  | NA                    | NA                    | 29.67            | 0.92               | 0.258749               | 64.75          | 0.559                |
| 22579             | Bil-7   | Sweden         | 18.4      | 63.2     | 3.5                   | 0                     | NA                    | 6.42             | 1.25               | 0.056818               | 76.25          | 0.719                |
| 10184             | Bl-1    | Italy          | 11        | 44       | 5.13                  | NA                    | NA                    | 19.89            | 0.12               | 0.058957               | 59.75          | 0.231                |
| 10185             | Bla-10  | Spain          | 2.6       | 41.5     | 25.87                 | NA                    | NA                    | 58.08            | 0.27               | 0.115429               | 58.5           | 0.304                |
| 6645              | Blh-1   | Czech Republic | 16.5      | 48.6     | 38.61                 | NA                    | NA                    | 45.77            | 0.16               | 0.199848               | 76             | 0.749                |
| 22551             | Boot    | United Kingdom | -3.3      | 54.4     | 65.72                 | NA                    | NA                    | 162.93           | NA                 | 0.191474               | 60.75          | 0.199                |
| 22590             | Bor-1   | Czech Republic | 16.5      | 49.2     | 3.5                   | 34                    | NA                    | 41.25            | 1.48               | 0.059935               | 67.25          | 0.799                |
| 22591             | Bor-4   | Czech Republic | 16.5      | 49.2     | 4.28                  | 28                    | NA                    | 40.47            | 1.98               | 0.124493               | 63             | 0.865                |
| 22628             | Br-0    | Czech Republic | 16.5      | 49       | NA                    | 73                    | 0.1                   | 160.66           | NA                 | 0.206641               | 61             | 0.592                |
| 6627              | Bs-1    | Switzerland    | 7.4       | 47.4     | 17.36                 | NA                    | NA                    | 64.06            | 0.07               | 0.094751               | 65.75          | 0.361                |
| 6094              | Bso-1a  | France         | 4.6       | 52.3     | 40.07                 | NA                    | NA                    | 110.78           | NA                 | 0.059841               | 63.5           | 0.218                |
| 22656             | Bur-0   | Ireland        | -8        | 53.5     | 3.5                   | 0                     | 0.19                  | 3.52             | 0.88               | 0.098816               | 71.25          | 0.382                |
| 10257             | Byn     | Norway         | 10.1      | 63.3     | 3.5                   | NA                    | NA                    | 4.13             | 0                  | 0.049127               | 85             | 0.472                |
| 22620             | C24     | Portugal       | -8.3      | 40.2     | 14.37                 | 119                   | 0.19                  | 37.63            | 0.03               | 0.061173               | 59.75          | 0.335                |
| 6659              | Cal-0   | United Kingdom | -1.6      | 53.3     | 3.5                   | NA                    | NA                    | 3.5              | 0.3                | 0.095204               | 72             | 0.377                |
| 10271             | Calamin | Belgium        | NA        | 50       | 17.07                 | NA                    | NA                    | 109.58           | NA                 | 0.105172               | 64.75          | 0.558                |
| 6042              | Car-1   | Italy          | 12.5      | 41.9     | 35.41                 | NA                    | NA                    | 130.2            | NA                 | 0.099032               | 63             | 0.578                |
| 22523             | Cerv-1  | Italy          | 12.5      | 41.9     | 40.5                  | NA                    | NA                    | 102.25           | NA                 | 0.092917               | 68             | 0.45                 |
| 22521             | Chat-1  | France         | 1.3       | 48.1     | 12.33                 | NA                    | NA                    | 150.36           | NA                 | 0.064677               | 61.25          | 0.417                |
| 22603             | CIBC-17 | United Kingdom | 0.6       | 51.4     | 33.15                 | 55                    | NA                    | 61.13            | 0.01               | 0.085809               | 68.5           | 0.549                |
| 22602             | CIBC-5  | United Kingdom | 0.6       | 51.4     | 17.28                 | 52                    | NA                    | 60.04            | NA                 | 0.159834               | 62.5           | 0.167                |
| 22639             | Ct-1    | Italy          | 15        | 37.5     | 4.67                  | 41                    | 0.11                  | 115.15           | NA                 | 0.086561               | 59.25          | 0.812                |
| 1116              | Dra-0   | Czech Republic | 16.3      | 49.4     | 4.25                  | NA                    | NA                    | 22.19            | 0.73               | 0.137626               | 59             | 0.877                |
| 10038             | Driel   | Netherlands    | 5.8       | 52       | 6.96                  | NA                    | NA                    | 24.94            | 0.15               | 0.068237               | 60.5           | 0.455                |
| 22572             | Eden-1  | Sweden         | 18.1      | 62.6     | 3.5                   | 2                     | NA                    | 5.24             | 0.5                | 0.087789               | 79             | 0.654                |
| 22573             | Eden-2  | Sweden         | 18.1      | 62.6     | 3.5                   | NA                    | NA                    | 4.06             | 1.69               | 0.062693               | 82.5           | 0.631                |
| 22657             | Edi-0   | United Kingdom | -3        | 56       | 19                    | 76                    | 0.07                  | 43.63            | 0                  | 0.105011               | 71             | 0.611                |
| 6693              | Eil-0   | Germany        | 12.6      | 51.5     | 5.15                  | NA                    | NA                    | 26.34            | 0.96               | 0.123077               | 59             | 0.882                |
| 6088              | Ely-1a  | United Kingdom | 0.3       | 52.4     | 22.15                 | NA                    | NA                    | 34.64            | 0.03               | 0.078407               | 75             | 0.295                |

|       |             |                |      |       |       |     |      |        |      |          |       |       |
|-------|-------------|----------------|------|-------|-------|-----|------|--------|------|----------|-------|-------|
| 1637  | Ema-1       | United Kingdom | -0.2 | 51.3  | 61.2  | NA  | NA   | 94.19  | NA   | 0.117075 | 61.25 | 0.086 |
| 1138  | En-2        | Germany        | 8.8  | 50.2  | 11.32 | NA  | NA   | 78.47  | NA   | NA       | 63    | 0.799 |
| 22548 | Eri         | Sweden         | 15.4 | 56.5  | 3.5   | NA  | NA   | 11.66  | 0    | 0.063494 | 60.5  | 0.803 |
| 6699  | Es-0        | Finland        | 25   | 60    | 12.32 | NA  | NA   | 47.03  | 0.06 | 0.145006 | 57.75 | 0.318 |
| 6700  | Est-0       | Estonia        | 26   | 59    | 11.68 | NA  | NA   | 68.21  | NA   | 0.181915 | 58.25 | 0.71  |
| 22629 | Est-1       | Estonia        | 25.5 | 58.5  | 3.5   | 9   | NA   | 36.94  | 2.28 | 0.065165 | 64.5  | 0.723 |
| 22645 | Fei-0       | Portugal       | -8.3 | 40.55 | 10.79 | 23  | 0.07 | 73.19  | 0.29 | 0.048177 | 62.25 | 0.15  |
| 6705  | Fi-1        | Germany        | 8    | 50.3  | 24.79 | NA  | NA   | 52.59  | 0.28 | 0.15035  | 58.75 | 0.454 |
| 1184  | Gd-1        | Germany        | 10.8 | 53.6  | 24.17 | NA  | NA   | 76.42  | 1.12 | 0.164413 | 59    | 0.661 |
| 22608 | Got-7       | Germany        | 9.8  | 51.4  | 39.7  | 61  | NA   | 76.55  | 0.15 | 0.065799 | 84.5  | 0.427 |
| 22534 | Hey         | Netherlands    | 5.9  | 51.3  | 34.97 | NA  | NA   | 105.1  | 1.66 | 0.067229 | 66.5  | 0.267 |
| 22597 | HR-10       | United Kingdom | 0.6  | 51.4  | 29.31 | 43  | NA   | 249.49 | NA   | 0.187755 | 58.5  | 0.078 |
| 22596 | HR-5        | United Kingdom | 0.6  | 51.4  | 6.86  | 58  | NA   | 90.49  | NA   | 0.022797 | 66.5  | 0.103 |
| 10043 | Jea         | France         | 7.3  | 43.6  | 21.23 | NA  | NA   | 61.88  | NA   | 0.045338 | 64.33 | 0.394 |
| 6752  | Ka-0        | Austria        | 13.9 | 46.7  | 4.23  | NA  | NA   | 61.96  | 0    | 0.11431  | 60.25 | 0.574 |
| 6754  | Kil-0       | United Kingdom | -5.5 | 55.4  | 13.52 | NA  | NA   | 121.07 | NA   | 0.10657  | 60.25 | 0.577 |
| 6045  | KL-PW-1     | Germany        | 7    | 50.9  | 4.1   | NA  | NA   | 39.67  | 1.77 | 0.182751 | 60.75 | 0.426 |
| 1287  | Kn-0        | Lithuania      | 23.7 | 54.7  | 3.5   | NA  | NA   | 10.22  | 0.15 | 0.044008 | 64.25 | 0.816 |
| 22618 | Ler-1       | Poland         | 15.2 | 52.7  | 3.5   | 10  | 0.83 | 9.15   | 0.22 | 0.088498 | 61.25 | 0.815 |
| 22650 | LL-0        | Spain          | 2.6  | 41.7  | 21.52 | 129 | 0.01 | 99.6   | NA   | 0.04144  | 60.25 | 0.393 |
| 6784  | Lm-2        | France         | 0.2  | 48    | 3.5   | NA  | NA   | 7.23   | 1.04 | 0.180164 | 57.5  | 0.193 |
| 22594 | Lp2-2       | Czech Republic | 16.5 | 49.3  | 11.45 | 13  | NA   | 32.31  | 1.2  | 0.11761  | 60.5  | 0.685 |
| 22595 | Lp2-6       | Czech Republic | 16.5 | 49.3  | 3.5   | 6   | NA   | 7.25   | 0.79 | 0.064857 | 63.75 | 0.813 |
| 22615 | Lz-0        | France         | 3.5  | 46    | 36.08 | 56  | NA   | 66.55  | 0.8  | 0.086364 | 65.75 | 0.38  |
| 6793  | Mh-1        | Poland         | 20.3 | 53.6  | 3.5   | NA  | NA   | 264    | NA   | 0.159998 | 59    | 0.712 |
| 22640 | Mr-0        | Italy          | 9.5  | 44.5  | 61.2  | 122 | NA   | 182.52 | NA   | 0.07785  | 78.25 | 0.497 |
| 22635 | Mrk-0       | Germany        | 9.5  | 49    | 16.71 | 17  | 0.09 | 34.59  | 0.74 | 0.119093 | 67.75 | 0.571 |
| 22636 | MZ-0        | Germany        | 8.5  | 50.5  | 16.63 | 30  | 0.15 | 49.09  | 0.23 | 0.110865 | 62.5  | 0.671 |
| 22619 | Nd-1        | Germany        | 10   | 51    | 11.84 | NA  | 0.11 | 89.5   | NA   | 0.052642 | 61    | 0.461 |
| 22599 | NFA-10      | United Kingdom | 0.6  | 51.4  | 9.09  | 5   | NA   | 72.1   | NA   | 0.112877 | 62.5  | 0.182 |
| 22598 | NFA-8       | United Kingdom | 0.6  | 51.4  | 7.53  | 38  | NA   | 132.64 | 0.28 | 0.1469   | 59.75 | 0.085 |
| 1394  | No-0        | Germany        | 13   | 51    | 3.5   | NA  | NA   | 10.75  | 0.8  | 0.103317 | 60.75 | 0.783 |
| 22643 | Nok-3       | Netherlands    | 4    | 52.5  | 22.79 | 36  | 0.04 | 59.74  | 1.37 | 0.067242 | 71.5  | 0.444 |
| 22584 | Omo2-1      | Sweden         | 15.3 | 56.2  | 20.64 | 73  | NA   | 182.53 | NA   | 0.043937 | 83.5  | 0.574 |
| 22585 | Omo2-3      | Sweden         | 15.3 | 56.2  | 40.06 | 70  | NA   | 58.23  | 0.03 | 0.143638 | 70.25 | 0.564 |
| 22649 | Pro-0       | Spain          | -6   | 43.2  | 79.29 | 79  | 0.02 | 134.41 | 0.1  | 0.093241 | 58    | 0.206 |
| 22593 | Pu2-23      | Croatia        | 18.1 | 42.5  | 3.5   | 28  | NA   | 34.94  | 1.28 | 0.111549 | 65    | 0.914 |
| 22592 | Pu2-7       | Croatia        | 18.1 | 42.5  | 13.24 | 33  | NA   | 44.64  | 0.19 | 0.056905 | 68.25 | 0.845 |
| 22632 | Ra-0        | France         | 3.4  | 46    | 49.98 | 64  | 0.05 | 105.46 | 1.06 | 0.062726 | 62    | 0.22  |
| 22610 | Ren-1       | France         | -1.6 | 48.7  | 16.86 | 51  | NA   | 39.53  | 0.18 | 0.042827 | 65.5  | 0.221 |
| 22611 | Ren-11      | France         | -1.6 | 48.7  | 16.27 | 41  | NA   | 54.97  | 0    | 0.080916 | 59    | 0.14  |
| 22524 | Rome-1      | Italy          | 12.5 | 41.9  | 29.75 | NA  | NA   | 165.29 | NA   | 0.102723 | 59.75 | 0.493 |
| 6917  | Sah-0       | Spain          | 3.1  | 39    | 57.05 | NA  | NA   | 101.82 | 0.27 | 0.163547 | 76    | 0.622 |
| 1514  | Sav-o       | Czech Republic | 13   | 49.8  | 3.5   | NA  | NA   | 21.77  | 2.26 | 0.155034 | 60.25 | 0.896 |
| 22646 | Se-0        | Spain          | 2.5  | 41.5  | 18.57 | 123 | 0.09 | 59.28  | 0.18 | 0.058419 | 59.75 | 0.45  |
| 6077  | Sed-1 (Sid- | United Kingdom | -3.2 | 50.7  | 37.44 | NA  | NA   | 229.95 | NA   | 0.082536 | 59    | 0.105 |

1)

|       |         |                |      |      |       |     |      |        |      |          |       |       |
|-------|---------|----------------|------|------|-------|-----|------|--------|------|----------|-------|-------|
| 1504  | Sei-0   | Italy          | 11.6 | 46.5 | 16.3  | NA  | NA   | 38.56  | 0.02 | 0.076746 | 62    | 0.589 |
| 1516  | Sf-2    | Spain          | 2.2  | 42   | 12.6  | NA  | NA   | 61.38  | 0.89 | 0.185139 | 57.5  | 0.436 |
| 22582 | Spr1-2  | Sweden         | 14.4 | 56.4 | 3.5   | NA  | NA   | 13.66  | 1.81 | 0.074689 | 81    | 0.559 |
| 22600 | Sq-1    | United Kingdom | 0.6  | 51.4 | 22.91 | NA  | NA   | 79.68  | NA   | 0.063777 | 66.75 | 0.179 |
| 22601 | Sq-8    | United Kingdom | 0.6  | 51.4 | 17.5  | 28  | NA   | 42.12  | 0.01 | 0.084515 | 60    | 0.365 |
| 1535  | St-0    | Sweden         | 18   | 59   | 18.03 | NA  | NA   | 29.97  | 0.4  | 0.12492  | 67.33 | 0.502 |
| 10256 | Strand  | Norway         | 11.2 | 60.3 | 3.5   | NA  | NA   | 16.93  | 0.81 | 0.062556 | 71.75 | 0.546 |
| 22604 | Tamm-2  | Finland        | 23.3 | 59.7 | 3.5   | 11  | NA   | 11.97  | 0.21 | 0.085243 | 71.25 | 0.56  |
| 22605 | Tamm-27 | Finland        | 23.3 | 59.7 | 3.5   | 6   | NA   | 18.11  | 0.33 | 0.07202  | 72.5  | 0.691 |
| 6918  | Te-0    | Finland        | 23.2 | 60.1 | 20.57 | NA  | NA   | 66.51  | 0.37 | 0.171372 | 71.25 | 0.588 |
| 10039 | Terlet  | Netherlands    | 6    | 52.1 | 3.91  | NA  | NA   | NA     | NA   | 0.087039 | 67.25 | 0.435 |
| 22537 | Tha-1   | Netherlands    | 4.3  | 52.1 | 26.08 | NA  | NA   | 37.09  | 0.04 | 0.044591 | 71    | 0.459 |
| 22647 | Ts-1    | Spain          | 3    | 41.5 | 18.93 | 129 | NA   | 72.07  | NA   | 0.141393 | 58    | 0.285 |
| 22648 | Ts-5    | Spain          | 3    | 41.5 | 34.42 | 127 | 0.1  | 79.74  | NA   | 0.12325  | 61.5  | 0.355 |
| 22518 | Tschag  | Austria        | 9.9  | 47.1 | 17.46 | NA  | NA   | 77.11  | 0.08 | 0.162568 | 62.75 | 0.691 |
| 10191 | Uk-2    | Germany        | 7.6  | 48   | 55.87 | NA  | NA   | 75.12  | 1.01 | 0.211036 | 59    | 0.571 |
| 22587 | Ull2-3  | Sweden         | 13.6 | 56.1 | 15.66 | 15  | NA   | 75.55  | NA   | 0.140898 | 64.75 | 0.509 |
| 22612 | Uod-1   | Austria        | 14.7 | 48.1 | 12.67 | 32  | NA   | 61.19  | 0.73 | 0.152667 | 65.75 | 0.602 |
| 22613 | Uod-7   | Austria        | 14.7 | 48.1 | 16.72 | 46  | NA   | 70.12  | 0.52 | 0.15326  | 65.5  | 0.584 |
| 10172 | Vil-0   | Spain          | 3.8  | 42.8 | 42    | NA  | NA   | 51.5   | 0.11 | 0.097446 | 80.75 | 0.337 |
| 22644 | Wa-1    | Poland         | 21   | 52.5 | 7.76  | 19  | 0.11 | 52.3   | 1.78 | 0.107253 | 59.25 | 0.78  |
| 22540 | Wag-1   | Netherlands    | 5.7  | 52   | 3.5   | NA  | NA   | 17.28  | 0.6  | 0.078745 | 66.5  | 0.595 |
| 22622 | Wei-0   | Switzerland    | 8.4  | 47.4 | 42.22 | 75  | 0.09 | 69.29  | 0.31 | 0.159259 | 57.25 | 0.414 |
| 10371 | Wha-2   | United Kingdom | -0.4 | 53   | NA    | NA  | NA   | 180    | NA   | 0.055824 | 65.5  | 0.091 |
| 22637 | Wt-5    | Germany        | 9.5  | 52.5 | 42.55 | 65  | 0.02 | 125.69 | NA   | 0.099735 | 65.5  | 0.599 |
| 22588 | Zdr-1   | Czech Republic | 16.5 | 49.2 | 10.03 | 20  | NA   | 40.54  | 0.74 | 0.204754 | 58.75 | 0.889 |
| 22589 | Zdr-6   | Czech Republic | 16.5 | 49.2 | 3.5   | 16  | NA   | 21.7   | 0.81 | 0.074019 | 67.5  | 0.816 |
| 1629  | Zu-1    | Switzerland    | 8.5  | 47.3 | 8.25  | NA  | NA   | 66.55  | 0.19 | 0.085289 | 60.5  | 0.336 |
